# Supplementary material for: Dedifferentiation by adenovirus E1A due to inactivation of Hippo pathway effectors YAP and TAZ
Source: PubMed Central journal article supplement — Genes Dev. 2019 Jul 1;33(13-14):828–43. doi: 10.1101/gad.324814.119 (PMC6601516; doi:10.1101/gad.324814.119), 2019-07-01
Supplement: supp_gad.324814.119_Supplemental_Figures.pdf [file supp_gad.324814.119_Supplemental_Figures.pdf]

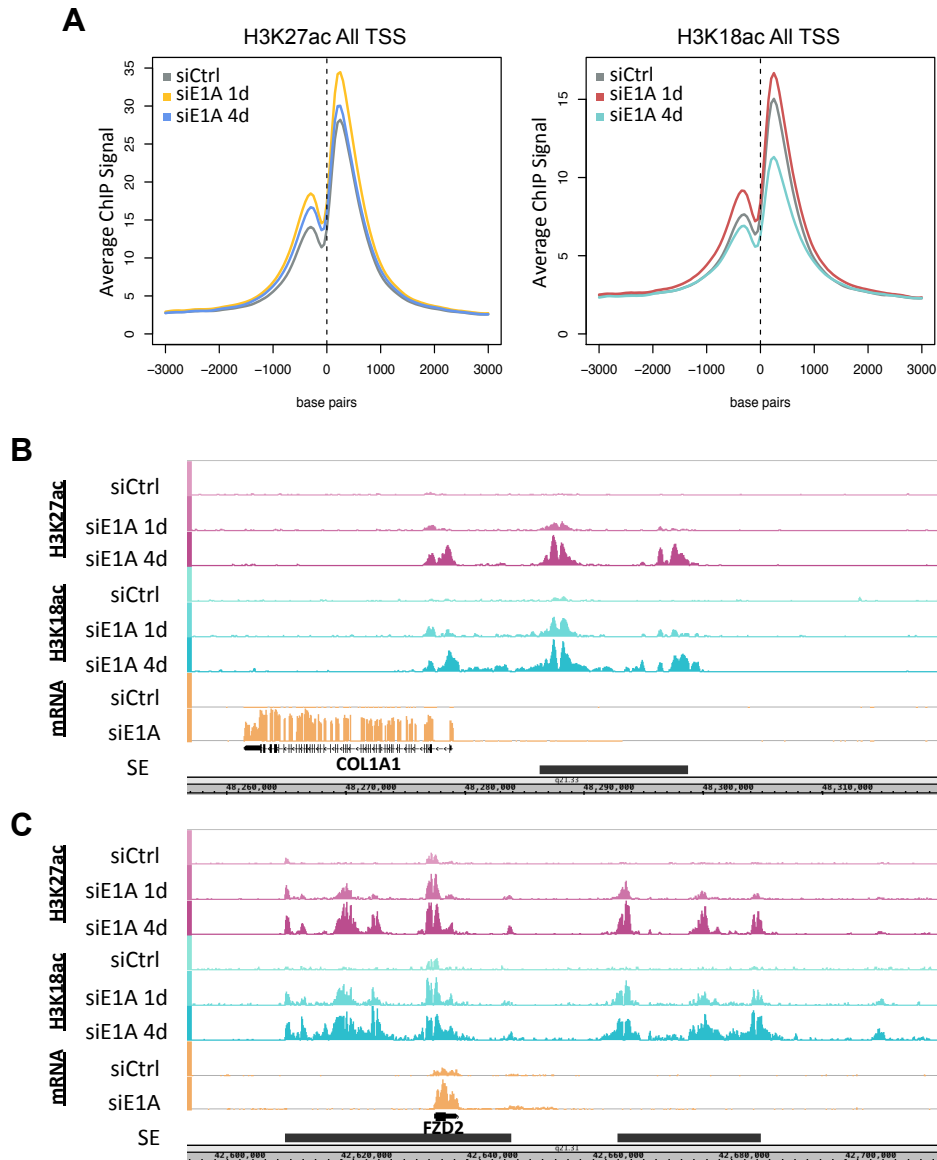

**Figure S1: E1AKD establishes super-enhancers. Related to Fig 1.**

**(A)** Average normalized ChIP-seq signal after transfection with the indicated siRNAs for 1 or 4 days centered at all TSSs. **(B)** Genome browser plots displaying normalized H3K27ac and H3K18ac ChIP-seq and RNA-seq reads at *COL1A1* and **(C)** *FZD2*. Super-enhancers (SE) indicated by black bars.

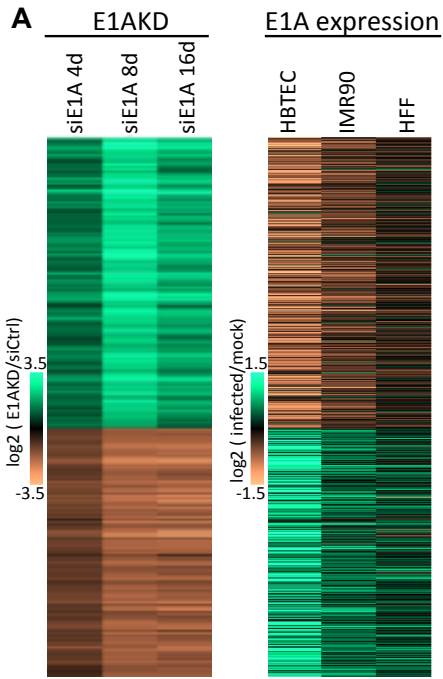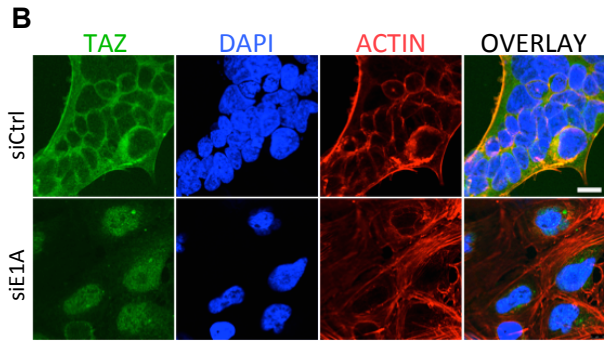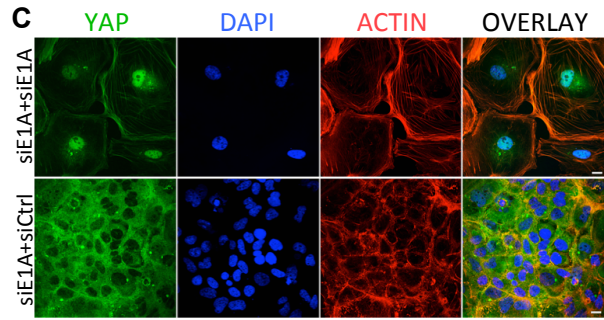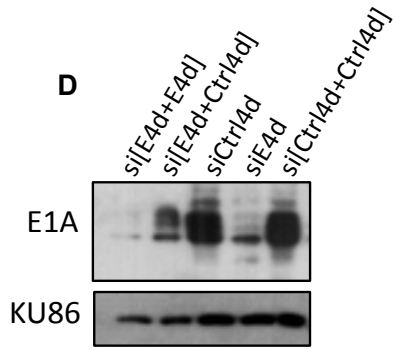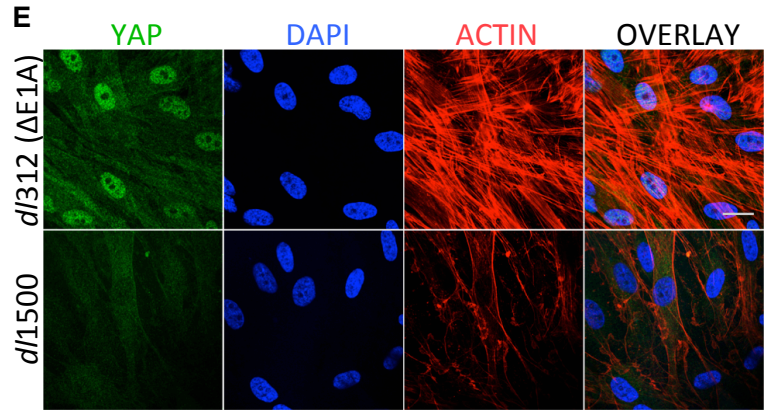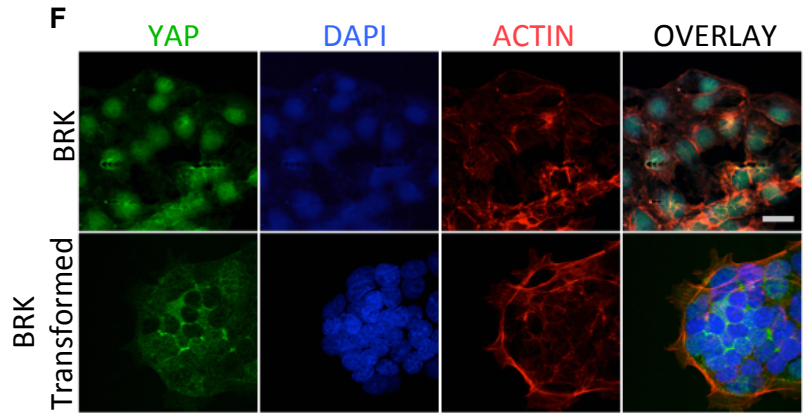

**Figure S2: E1A regulates localization of YAP/TAZ in different cells. Related to Fig 3.**

**(A)** Heatmap of expression changes for all genes repressed and de-repressed >2-fold  $q < 0.05$  by E1A siRNA 8 days post transfection. E1AKD at 4, 8, and 16 days post siRNA in HEK293 cells (left), and the same genes in HBTEC, IMR90, or HFF 24 h post infection with Ad5 *d/1500* expressing small E1A (right). **(B)** Confocal microscopy of 4 day siRNA transfected HEK293 cells fixed and immuno-stained with anti-TAZ (CL0371) and stained with phalloidin-iFluor and DAPI. Scale bars = 20  $\mu$ M. **(C)** HEK293 cells were transfected with siE1A RNA. Four days later, the media was changed to media with siE1A RNA (top row, siE1A+siE1A), or media with siCtrl RNA (siE1A+siCtrl). 4 days later cells were fixed and stained with anti-YAP antibody (DH81X), phalloidin-iFluor and DAPI and confocal micrographs were prepared. **(D)** Western blot for E1A protein (M58 antibody) from cell extract transfected with indicated siRNAs for indicated time, + indicates following first transfection. KU86 serves as loading control. **(E)** Confocal microscopy of IMR90 cells infected for 4 days with Ad5 *d/312* ( $\Delta$ E1A) or *d/1500* (expressing small E1A) at MOI 10. Fixed and immuno-stained with anti-YAP (DH81X) phalloidin-iFluor and DAPI. **(F)** Confocal microscopy of normal BRK cells or BRK transformed with Ad2 E1A and E1B. Fixed and immuno-stained with anti-YAP (DH81X) and stained with phalloidin-iFluor and DAPI.

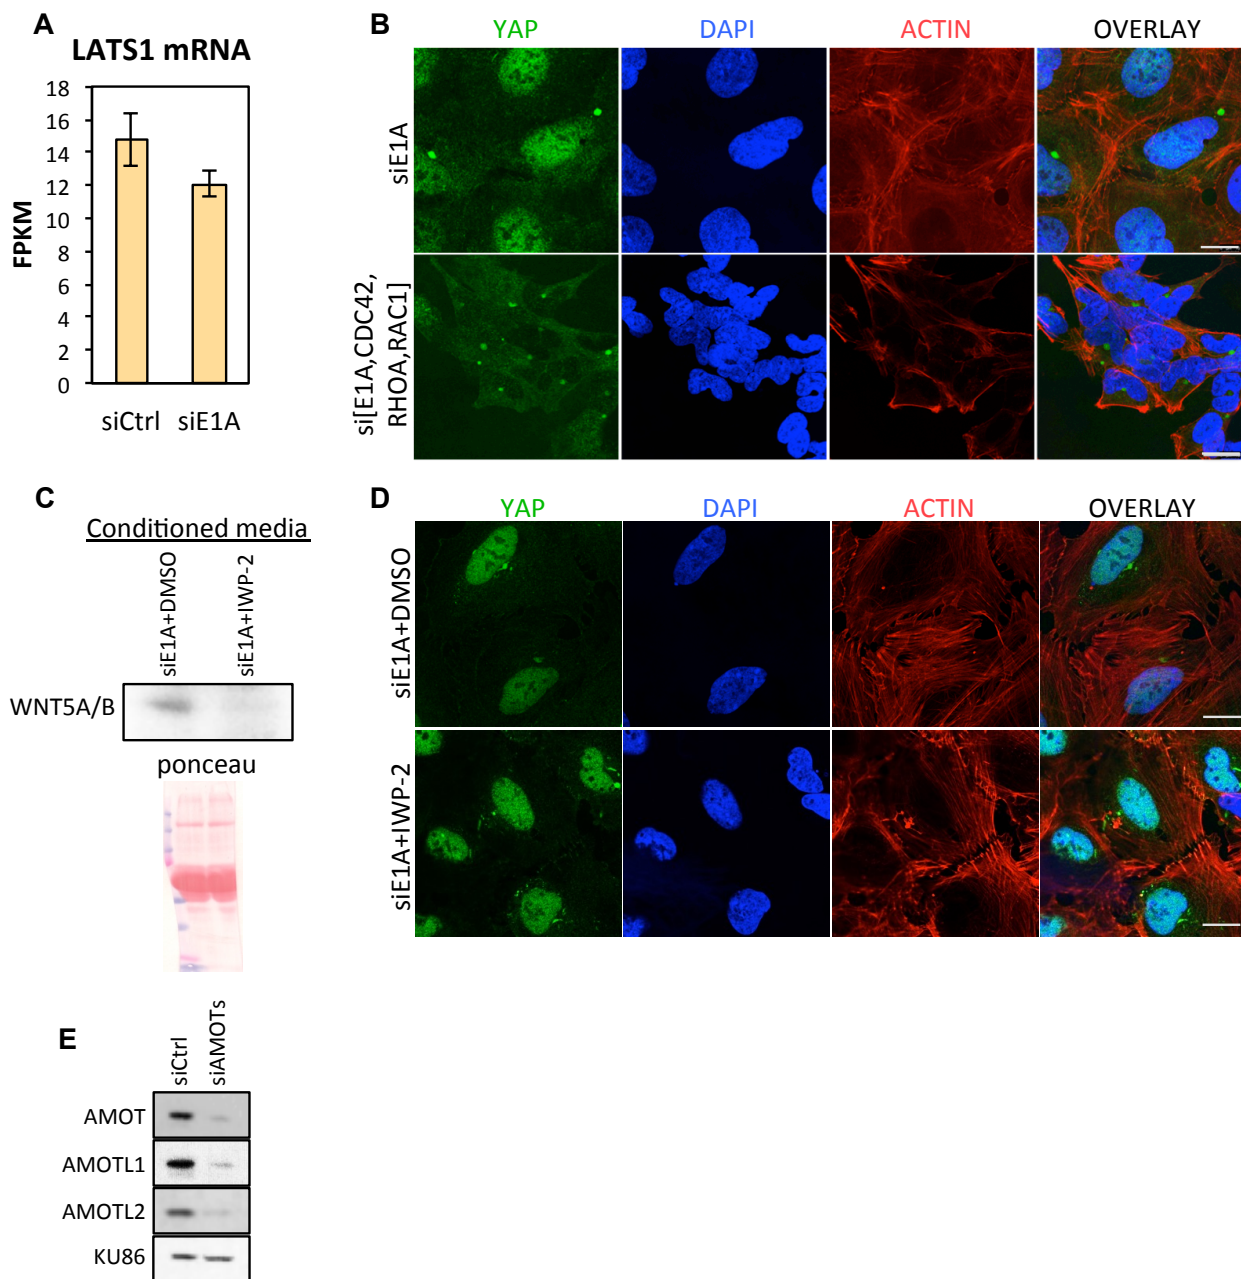

**Figure S3: E1AKD-activation of YAP depends on F-actin and Rho-family GTPases but not Alternative Wnt signaling. Related to Fig 5.**

**(A)** Average expression level (FPKM) of LATS1 from 3 replicates of siRNA transfected HEK2993 cells. **(B)** Confocal microscopy of 4 day siRNA transfected HEK2993 cells fixed and immuno-stained with anti-YAP (DH81X), phalloidin-iFluor

and DAPI. Scale bars = 20 $\mu$ M. **(C)** Western blot for WNT5A/B using supernatant of E1AKD293 cell culture conditioned media following 4 days of transfection and DMSO or IWP-2 (2 $\mu$ M) treatment. Ponceau red of membrane serves as a loading control. **(D)** Confocal microscopy of HEK293 cells 4days after siRNA transfection and addition of either DMSO or IWP-2 in DMSO (2  $\mu$ M final media concentration). Cells were fixed and immuno-stained with anti-YAP (DH81X) and stained with phalloidin-iFluor and DAPI. **(E)** Western blots of AMOT, AMOTL1, and AMOTL2 in cells treated for 3 days with siCtrl or siAMOT, siAMOTL1, and siAMOTL2 (siAMOTs). KU86 serves as loading control.

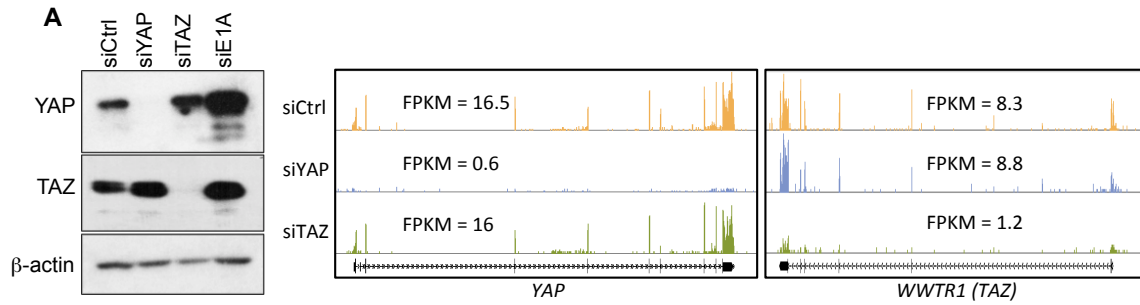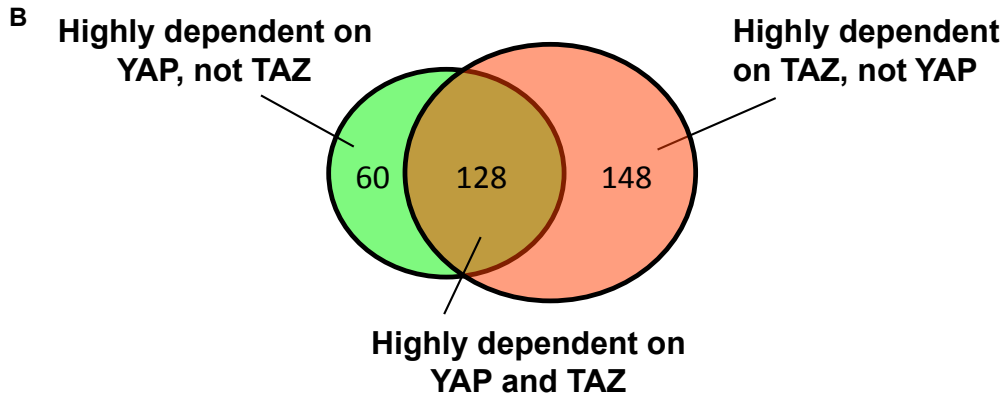

**Highly dependent on YAP, not TAZ**

|                                           | <u>P-value</u> | <u>Benjamini</u> |
|-------------------------------------------|----------------|------------------|
| focal adhesion                            | 3.2E-07        | 4.5E-05          |
| positive regulation of cell proliferation | 1.4E-06        | 1.1E-03          |
| angiogenesis                              | 5.3E-06        | 1.5E-03          |
| extracellular region                      | 2.2E-05        | 1.6E-03          |
| cell growth                               | 2.7E-05        | 5.5E-03          |

**Highly dependent on TAZ, not YAP**

|                                    |         |         |
|------------------------------------|---------|---------|
| extracellular space                | 1.3E-15 | 1.4E-13 |
| proteinaceous extracellular matrix | 3.1E-12 | 1.4E-14 |
| extracellular matrix               | 3.8E-05 | 1.3E-03 |
| heparin binding                    | 1.3E-04 | 1.7E-02 |
| calcium ion binding                | 4.0E-04 | 2.6E-02 |

**Highly dependent on both YAP and TAZ**

|                                             |         |         |
|---------------------------------------------|---------|---------|
| extracellular space                         | 2.0E-13 | 2.0E-11 |
| proteinaceous extracellular matrix          | 2.8E-10 | 1.4E-08 |
| extracellular matrix structural constituent | 3.7E-07 | 4.4E-05 |
| collagen fibril organization                | 2.4E-06 | 1.5E-03 |
| extracellular matrix                        | 9.5E-06 | 3.2E-04 |

**Figure S4: Genes highly dependent on YAP but not TAZ are enriched for cell proliferation. Related to Fig 6.**

**(A)** Left: protein levels (western blots) of YAP and TAZ following indicated siRNA transfections for 2 days.  $\beta$ -actin serves as a loading control. Right: Genome browser plots (IGB) displaying mRNA-seq signal of *YAP* and *WWTR1* (*TAZ*) following indicated siRNA treatment. **(B)** Venn diagram and gene ontology (DAVID) enrichment terms for E1AKD de-repressed genes ( $\text{siE1A}/\text{siCtrl} > 2X$ ,  $q < 0.05$ ) that are highly dependent on YAP, not TAZ ( $\text{si}[E1A+YAP]/\text{siE1A} < 0.2$ ), highly dependent on TAZ, not YAP ( $\text{si}[E1A+TAZ]/\text{siE1A} < 0.2$ ), or highly dependent on YAP and TAZ ( $\text{si}[E1A+YAP]/\text{siE1A} < 0.2$  and  $\text{si}[E1A+TAZ]/\text{siE1A} < 0.2$ ).

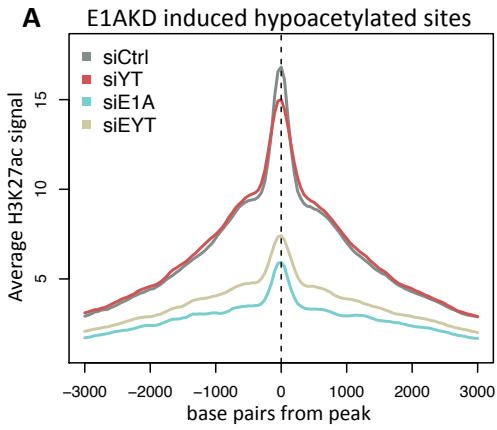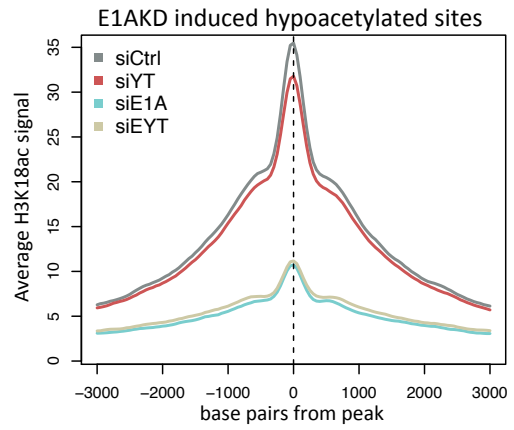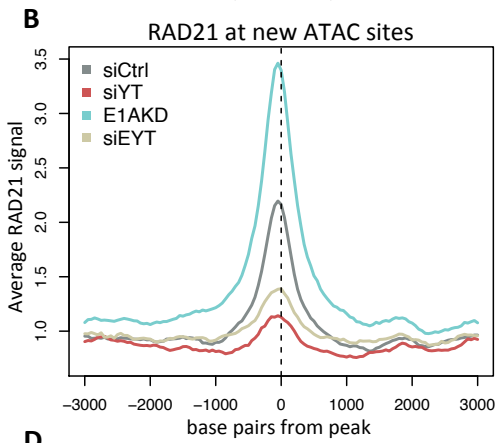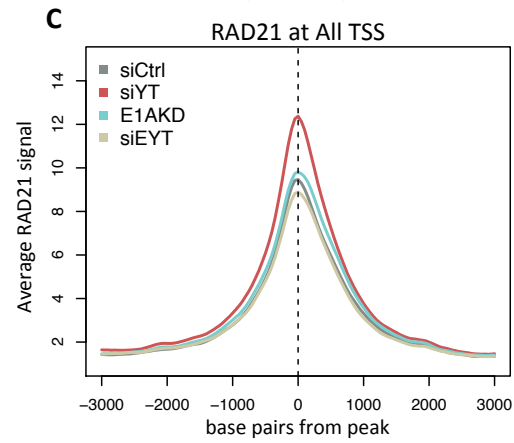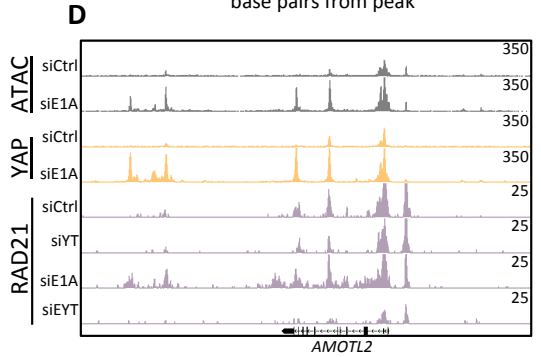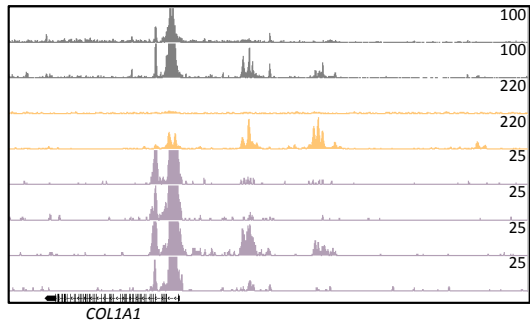



**Figure S5: YAP/TAZ are necessary for cohesin loading at enhancers.**

**Related to Fig 6.**

**(A)** Average ChIP-seq signal after transfection with the indicated siRNAs for 4 days centered at H3K27ac peaks that decreased >2X following 4 days of E1AKD. **(B)** Average RAD21 ChIP-seq signal after transfection with the indicated siRNAs for 4 days centered at ATAC-seq peaks that increased >5X (new ATAC sites) following 4 days of E1AKD. **(C)** Average RAD21 ChIP-seq signal after transfection with the indicated siRNAs for 4 days centered at all TSSs. **(D)** Genome browser plots (IGB) displaying indicated ATAC- and ChIP-seq signal at super-enhancers near E1AKD de-repressed genes *AMOTL2* and *COL1A1*.

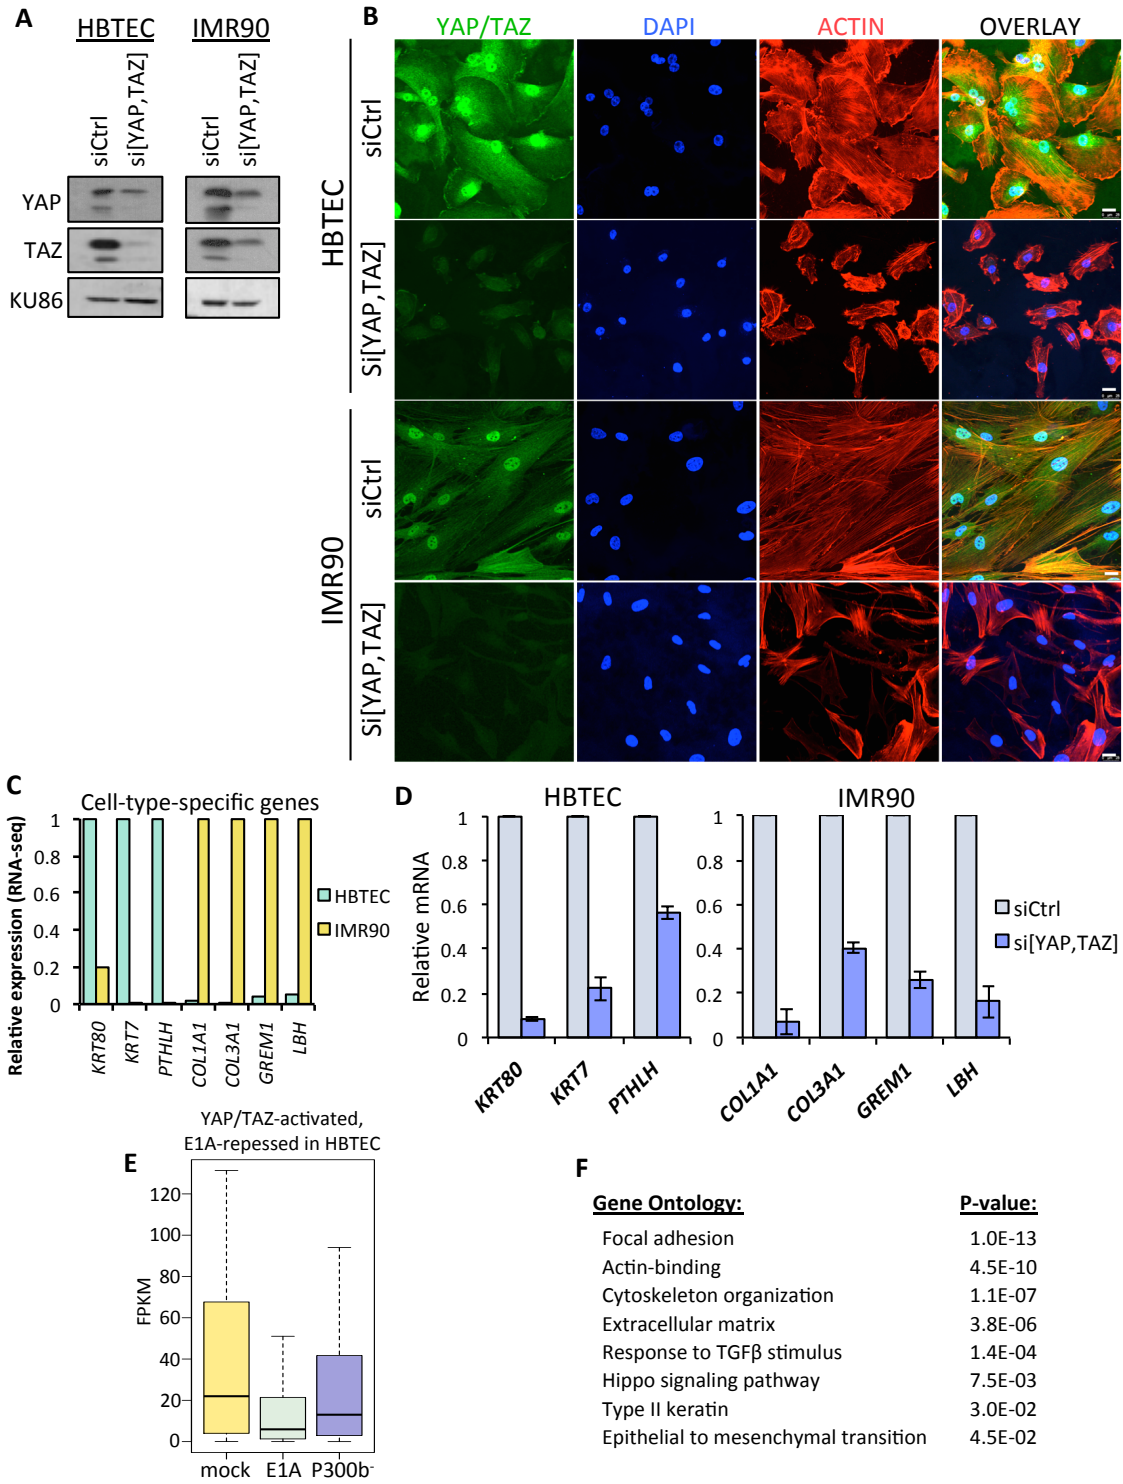

**Figure S6: YAP and TAZ are necessary for normal F-actin in primary cells.**

Related to Fig 6.

**(A)** Western blot of YAP or TAZ from HBTEC or IMR90 transfected with indicated siRNAs for 3 days. YAP and TAZ KDs were less efficient than in HEK293 (Fig S4A). KU86 serves as loading control. **(B)** Confocal microscopy of HBTEC or IMR90 cells after 4 day siRNA transfection. Fixed and immuno-stained with anti-YAP (DH81X) and anti-TAZ (CL0371) stained with phalloidin-iFluor and DAPI. Scale bar = 20  $\mu$ m. **(C)** Relative expression (arbitrary units) from RNA-seq of HBTEC or IMR90 cell type-specific genes. **(D)** qRT-PCR from HBTEC or IMR90 transfected for 3 days with the indicated siRNAs showing averages relative to siCtrl for each gene and standard deviations of three experimental replicates. **(E)** Boxplots representing the distribution of FPKM values of WT small E1A repressed genes (>2-fold repression compared to mock) in HBTEC that are also YAP/TAZ-dependent activated genes (>2-fold defective for activation comparing si[E1A,YAP,TAZ] to si[E1A]) in E1AKD293 cells. E1A = HBTEC infected with an Ad5 vector expressing small E1A. P300b- = HBTEC infected with an Ad5 vector expressing a mutant small E1A unable to bind CBP/p300 (Ferrari et al., 2014). **(F)** Gene ontology terms (DAVID) and p-values for genes analyzed in (E).
